# Supplementary material for: Simultaneous trimodal single-cell measurement of transcripts, epitopes, and chromatin accessibility using TEA-seq
Source: eLife. 2021 Apr 9;10:e63632. doi: 10.7554/eLife.63632 (PMC8034981; doi:10.7554/eLife.63632)
Supplement: Supplementary file 1. [file elife-63632-supp1.xlsx]

## Sheet: Table 1 - Bead Abs
Manufacturer	Catalog No.	Conjugate	Target	Clone	Vol per M cells (µl)	RRID
BioLegend	301913	Biotin	CD15	HI98	0.15	AB_2561325
BD	563562	BUV395	CD14	MφP9	1	AB_2744288
BD	750179	BUV496	CD45	HI30	1	AB_2868405
BD	741417	BUV563	CD15	W6D3	1	AB_2868406
BD	613001	BUV615	CD56	NCAM16.2	2	AB_2868413
BD	564406	BV510	FVS 510	NA	NA	AB_2869572
BioLegend	300468	BV650	CD3	UCHT1	2	AB_2629574
BD	624296	BB790	CD19	HIB19	1	NA
BioLegend	302009	PE-Cy5	CD16	3G8	1	AB_314209
