# Supplementary material for: Simultaneous trimodal single-cell measurement of transcripts, epitopes, and chromatin accessibility using TEA-seq
Source: eLife. 2021 Apr 9;10:e63632. doi: 10.7554/eLife.63632 (PMC8034981; doi:10.7554/eLife.63632)
Supplement: Supplementary file 2. — The gating strategy used to assess these populations is presented in Figure 1—figure supplement 4. [file elife-63632-supp2.xlsx]

## Sheet: Table 2 - Bead Depletion Flow S
	Ficoll	Ficoll	Leukapheresis	Leukapheresis
	Pre-depletion	Post-depletion	Pre-depletion	Post-depletion
Total event count	253090	291303	500000	500000
Exclude debris (% of Total)	86.6	93.4	66.7	74.5
Single Cell (% of Total)	85.7	92.5	65.7	73.8
Viable cell (% of Total)	76.3	83.8	58.9	67.3
CD45+ (% of Total)	74.3	82.7	53.4	63
CD45+ Count	188102	240961	267101	315133
Neutrophils (% of Total)	1.08	0	0	0
Neutrophils count	2031	1	0	0
Neutrophils (% of CD45+)	1.08	0	0	0
NK cells (% of CD45+)	12.29	13.41	32.74	33.49
T cells (% of CD45+)	56.05	59.85	45.98	46.27
B cells (% of CD45+)	8.76	8.36	7	6.81
Classical Mono. (% of CD45+)	14.86	11.76	4.17	3.78
Intermediate Mono. (% of CD45+)	1.87	2.08	1.59	1.39
Non-Classical Mono. (% of CD45+)	0.94	1.07	3.27	3.22
