# Supplementary material for: Simultaneous trimodal single-cell measurement of transcripts, epitopes, and chromatin accessibility using TEA-seq
Source: eLife. 2021 Apr 9;10:e63632. doi: 10.7554/eLife.63632 (PMC8034981; doi:10.7554/eLife.63632)
Supplement: Supplementary file 3. [file elife-63632-supp3.xlsx]

## Sheet: Table 3 - Flow Cytometry Panel
Manufacturer	Catalog No.	Conjugate	Target	Clone	Titer*	RRID
BD	563546	BUV395	CD3	UCHT1	1:50	AB_2744387
BD	750179	BUV496	CD45	HI30	1:50	AB_2868405
BD	741417	BUV563	CD15	W6D3	2:40	AB_2868406
BD	624297	BUV615	CD45RA	HI100	4:20	NA
BD	741684	BUV661	CD14	MφP9	1:50	AB_2868407
BD	749367	BUV737	CD8a	RPA-T8	4:20	AB_2868408
BD	742005	BUV805	CD11c	B-ly6	1:33	AB_2868409
BD	562442	BV421	CD25 (IL2Ra)	M-A251	1:50	AB_11154578
BD	566104	BV480	CD4	SK3	4:20	AB_2739506
BD	564406	FVS510	Live/Dead	N/A	0.25	AB_2869572
BD	563172	BV605	CD16	3G8	1:50	AB_2744297
BioLegend	306020	BV650	CD123 (IL3Ra)	6H6	1:50	AB_2563827
BioLegend	351328	BV711	CD127 (IL7Ra)	A0195D5	1:50	AB_2562908
BD	747484	BV750	IgD	IA6-2	2:40	AB_2868411
BD	743132	BV786	CD304	U21-1283	1:50	AB_2741299
BD	565084	BB515	CD141	1A4	1:33	AB_2739058
BD	561114	PerCp-Cy5.5	CD11b	M1/70	4:20	AB_2033995
BD	624296	BB790	CD19	HIB19	2:40	NA
BioLegend	302808	PE	CD27	O323	2:40	AB_314300
BioLegend	306726	PE/Dazzle594	TCRαß	IP26	1:33	AB_2566599
BD	555823	PE-Cy5	CD34	581	1:20	AB_396152
BioLegend	353226	PE/Cy7	CD197 (CCR7)	G043H7	1:33	AB_11126145
BioLegend	356606	APC	CD38	HB-7	2:40	AB_2561902
BD	565139	APC-R700	CD56	NCAM16.2	2:40	AB_2744429
BioLegend	307618	APC/Cy7	HLA-DR	L243	2:40	AB_493586
*Titers are determined based on 100 uL staining volume
