# Supplementary material for: Simultaneous trimodal single-cell measurement of transcripts, epitopes, and chromatin accessibility using TEA-seq
Source: eLife. 2021 Apr 9;10:e63632. doi: 10.7554/eLife.63632 (PMC8034981; doi:10.7554/eLife.63632)
Supplement: Supplementary file 4. — The gating strategy used to assess these populations is presented in Figure 2—figure supplement 1. Type labels and proportions used for comparisons of scATAC-seq cell-type labeling in Figure 2d are provided in the last two columns. When two gated populations are combined to tabulate a single cell type, the same cell-type label is listed beside each gate. Cell-type proportions are listed only at the first instance of each cell type. [file elife-63632-supp4.xlsx]

## Sheet: Table 4 - Survey Panel Pops
Gate Name	Parent Gate	Count	% of CD45+	Figure 2 Type Label	Figure 2 Type Fraction
Cells	NA	294322
Singlets	Cells	289982
Cleanup	Singlets	288924
Viable Cells	Cleanup	274425
Leukocytes	Viable Cells	272883	1
Granulocytes	Leukocytes	20474	0.075
Non-Granulocytes	Leukocytes	252409	0.925
B Cells	Non-Granulocytes	25826	0.0946
DN B Cells	B Cells	549	0.002
Naive B Cells	B Cells	19515	0.0715	B.Naive	0.0854231
Plasmablasts	B Cells	779	0.0029
Post Switch Memory B Cells	B Cells	3776	0.0138	B.Activated	0.025222
Pre Switch Memory B Cells	B Cells	1986	0.0073	B.Activated
CD3+CD19+ Cells	Non-Granulocytes	440	0.0016
Myeloid/DC/NK	Non-Granulocytes	146065	0.5353
HLA-DR+ Cells	Myeloid/DC/NK	87623	0.3211
Other HLA-DR+	HLA-DR+ Cells	8774	0.0322
pDC	Other-HLA-DR+	802	0.0029	DC.Plasmacytoid	0.0035106
Non-pDC	Other-HLA-DR+	7972	0.0292
CD11c-CD141- Cells	Non-pDC	6711	0.0246
cDC1	Non-pDC	132	0.0005	DC.Myeloid	0.00405776
cDC2	Non-pDC	795	0.0029	DC.Myeloid
CD14 Mono	HLA-DR+ Cells	56107	0.2056	Mono.CD14	0.245598
Interm. Mono	HLA-DR+ Cells	3870	0.0142
CD16 Mono	HLA-DR+ Cells	18872	0.0692	Mono.CD16	0.0826085
HLA-DR+CD56+ Cells	Myeloid/DC/NK	48148	0.1764	NK	0.229712
HLA-DR-	Myeloid/DC/NK	5964	0.0219
Basophils	HLA-DR-	4844	0.0178
NK Cells	Myeloid/DC/NK	4330	0.0159	NK
T Cells	Non-Granulocytes	80078	0.2935
ab T Cells	T Cells	77327	0.2834
CD4 T Cells	ab T Cells	65019	0.2383
Tregs	CD4 T Cells	2688	0.0099
CM CD4 Treg Cells	Tregs	1497	0.0055
EM CD4 Treg Cells	Tregs	846	0.0031
Naive CD4 Treg Cells	Tregs	341	0.0012
TEMRA CD4 Treg Cells	Tregs	4	0
Non-Treg Cells	CD4 T Cells	62331	0.2284
CM CD4 T Cells	Non-Treg Cells	34910	0.1279	T.CD4.Memory	0.189962
EM CD4 T Cells	Non-Treg Cells	8353	0.0306	T.CD4.Memory
Naive CD4 T Cells	Non-Treg Cells	18934	0.0694	T.CD4.Naive	0.0828799
TEMRA CD4 T Cells	Non-Treg Cells	134	0.0005	T.CD4.Memory
CD8 T Cells	ab T Cells	11127	0.0408
CM CD8 T Cells	CD8 T Cells	2088	0.0077	T.CD8.Effector	0.0334382
EM CD8 T Cells	CD8 T Cells	2042	0.0075	T.CD8.Effector
Naive CD8 T Cells	CD8 T Cells	3488	0.0128	T.CD8.Naive	0.015268
TEMRA CD8 T Cells	CD8 T Cells	3509	0.0129	T.CD8.Effector
DN T Cells	ab T Cells	530	0.0019	T.DoubleNegative	0.00231997
DP T Cells	ab T Cells	651	0.0024
gd T Cells	T Cells	1968	0.0072
CD4 gd T Cells	gdT Cells	4	0
CD8 gd T Cells	gdT Cells	398	0.0015
DN gd T Cells	gdT Cells	1566	0.0057
DP gd T Cells	gdT Cells	0	0
