# Supplementary material for: Simultaneous trimodal single-cell measurement of transcripts, epitopes, and chromatin accessibility using TEA-seq
Source: eLife. 2021 Apr 9;10:e63632. doi: 10.7554/eLife.63632 (PMC8034981; doi:10.7554/eLife.63632)
Supplement: Supplementary file 5. [file elife-63632-supp5.xlsx]

## Sheet: Table 5 - ICICLE Oligos
Name	Sequence (5'->3')	Modifications	Purification	Length	Notes
MOSAIC_Bot	5'-/5phos/CTGTCTCTTATACACATCT-'3	5' Phosphate	Standard Desalitng	19	Tn5MErev
Tn5ME-s7_Top	5'-GTCTCGTGGGCTCGGAGATGTGTATAAGAGACAG-3'	NA	Standard Desalitng	34	Compatible with Nextera i7 primers
Poly-A Top-L	5'- TTTTTTTTTTTTTTTTTTTTTTTTTTTTTTVNAGATGTGTATAAGAGACAG -3'	NA	Standard Desalitng	51	Poly-A Capture
SI-P5-22	5'- AATGATACGGCGACCACCGAGATCTACACTCTTTCCCTACACGACGCTCTTCCGATCT -3'	NA	Standard Desalitng	58	TruSeq P5 primer
F BC Primer	5’-CTACACGACGCTCTTCCGATCT-3’	NA	Standard Desalitng	22	Forward
ADT-Rev-AMP	5'- CCTTGGCACCCGAGAATTCC -3'	NA	Standard Desalitng	20	Reverse primer for ADT PCR amp during barcoding reaction (pre-indexing PCR)
TruSeq R1 Seq Primer	5'- ACACTCTTTCCCTACACGACGCTCTTCCGATCT -3'	NA	Standard Desalitng	33	TruSeq R1 sequencing primer
ADT-i7 Primer	5'- CAAGCAGAAGACGGCATACGAGATNNNNNNNNGTGACTGGAGTTCCTTGGCACCCGAGAATTCC*A -3'	Phosphorothioate bond	PAGE	65	ADT i7 Indexing Primer (variable 8bp index sequence)
SI-PCR-Oligo	5'- AATGATACGGCGACCACCGAGATCTACACTCTTTCCCTACACGACGCTC -3'	NA	Standard Desalitng	49	P5 primer for ADT library
