# Supplementary material for: Simultaneous trimodal single-cell measurement of transcripts, epitopes, and chromatin accessibility using TEA-seq
Source: eLife. 2021 Apr 9;10:e63632. doi: 10.7554/eLife.63632 (PMC8034981; doi:10.7554/eLife.63632)
Supplement: Supplementary file 6. [file elife-63632-supp6.xlsx]

## Sheet: Table 6 - ICICLE Ab
Target	Clone	ICICLE ug Ab / M cells	TEA-seq ug Ab / M cells	Ensemble Gene Id	RRID	BioLegend Catalog No.	Used for ICICLE-seq Analysis	Used for TEA-seq analysis
CD10	HI10a	0.5	0.5	ENSG00000196549	AB_2734286	312231	Yes	Yes
CD11b	ICRF44	0.05	0.05	ENSG00000169896	AB_2734249	301353	Yes	Yes
CD11c	S-HCL-3	0.025	0.025	ENSG00000140678	AB_2749971	371519	Yes	Yes
CD123	6H6	0.1	0.1	ENSG00000185291	AB_2749977	306037	Yes	Yes
CD127 (IL-7Rα)	A019D5	0.025	0.025	ENSG00000168685	AB_2734366	351352	Yes	Yes
CD14	M5E2	0.2	0.2	ENSG00000170458	AB_2734254	301855	Yes	Yes
CD141 (Thrombomodulin)	M80	0.1	0.1	ENSG00000178726	AB_2783229	344121	Yes	Yes
CD16	3G8	0.05	0.05	ENSG00000203747	AB_2734255	302061	Yes	Yes
CD172a (SIRPa)	15-414	0.25	0.25	ENSG00000198053	AB_2783285	372109	Yes	Yes
CD185 (CXCR5)	J252D4	0.125	0.125	ENSG00000160683	AB_2750356	356937	Yes	Yes
CD19	HIB19	0.2	0.2	ENSG00000177455	AB_2734256	302259	Yes	Yes
CD192 (CCR2)	K036C2	0.5	0.5	ENSG00000121807	AB_2750501	357229	Yes	Yes
CD197 (CCR7)	G043H7	0.75	0.5	ENSG00000126353	AB_2750357	353247	Yes	Yes
CD21	Bu32	0.05	0.05	ENSG00000117322	AB_2750006	354915	Yes	Yes
CD24	ML5	0.5	0.5	ENSG00000272398	AB_2750374	311137	Yes	Yes
CD25	BC96	0.02	0.08	ENSG00000134460	AB_2734258	302643	No	Yes
CD269 (BCMA)	19F2	0.5	0.5	ENSG00000048462	AB_2749974	357521	Yes	Yes
CD27	LG.3A10	0.125	0.125	ENSMUSG00000030336, ENSG00000139193	AB_2750344	124235	Yes	Yes
CD278 (ICOS)	C398.4A	0.01	0.01	ENSMUSG00000026009, ENSG00000163600	AB_2800824	313555	No	Yes
CD279 (PD-1)	EH12.2H7	0.1	0.1	ENSG00000188389	AB_2734322	329955	Yes	Yes
CD3	UCHT1	0.05	0.05	ENSG00000167286	AB_2734246	300475	Yes	Yes
CD304 (Neuropilin-1)	12C2	0.1	0.1	ENSG00000099250	AB_2783261	354525	No	Yes
CD319 (CRACC)	162.1	0.5	0.5	ENSG00000026751	AB_2800872	331821	Yes	Yes
CD38	HB-7	0.05	0.05	ENSG00000004468	AB_2800967	356635	Yes	Yes
CD39	A1	0.05	0.05	ENSG00000138185	AB_2750005	328233	Yes	Yes
CD4	RPA-T4	0.1	0.1	ENSG00000010610	AB_2734247	300563	Yes	Yes
CD40	5C3	0.25	0.25	ENSG00000101017	AB_2749968	334346	Yes	Yes
CD45RA	HI100	0.0625	0.0625	ENSG00000081237	AB_2734267	304157	Yes	Yes
CD45RO	UCHL1	0.1	0.1	ENSG00000081237	AB_2734268	304255	Yes	Yes
CD56 (NCAM)	5.1H11	0.15	0.15	ENSG00000149294	AB_2749970	362557	Yes	Yes
CD66b	6/40c	0.25	0.25	ENSG00000124469	AB_2750372	392905	No	Yes
CD71	CY1G4	0.025	0.025	ENSG00000072274	AB_2800884	334123	Yes	Yes
CD80	2D10	1	0.5	ENSG00000121594	AB_2749958	305239	No	Yes
CD86	IT2.2	0.05	0.05	ENSG00000114013	AB_2734273	305443	Yes	Yes
CD8a	RPA-T8	0.2	0.2	ENSG00000153563	AB_2734248	301067	Yes	Yes
CD95 (Fas)	DX2	0.1	0.1	ENSG00000026103	AB_2750368	305649	Yes	Yes
FcεRIα	AER-37 (CRA-1)	0.5	0.5	ENSG00000179639	AB_2750503	334641	Yes	Yes
HLA-DR	L243	0.25	0.25	ENSG00000204287	AB_2750001	307659	Yes	Yes
IgD	IA6-2	0.05	0.05	ENSG00000211898	AB_2783238	348243	Yes	Yes
Mouse IgG1, κ Isotype Control	MOPC-21	0.5	0.5	NA	AB_2868412	400199	Control	Control
IgM	MHM-88	0.05	0.05	ENSG00000211899	AB_2749992	314541	Yes	Yes
KLRG1 (MAFA)	SA231A2	0.25	0.25	ENSG00000139187	AB_2750373	367721	Yes	Yes
TCR Vα24-Jα18 (iNKT cell)	6B11	1	0.5	NA	AB_2783227	342923	Yes	Yes
TCR Vα7.2	3C10	0.05	0.05	NA	AB_2783246	351733	No	Yes
TCR α/β	IP26	0.125	0.125	NA	AB_2783167	306737	Yes	Yes
TCR γ/δ	B1	1	0.5	NA	AB_2734325	331229	Yes	Yes
