# Supplementary material for: Simultaneous trimodal single-cell measurement of transcripts, epitopes, and chromatin accessibility using TEA-seq
Source: eLife. 2021 Apr 9;10:e63632. doi: 10.7554/eLife.63632 (PMC8034981; doi:10.7554/eLife.63632)
Supplement: Supplementary file 7. [file elife-63632-supp7.xlsx]

## Sheet: Table 7 - Biological Sample Sou
Sample ID	Source	Sponsor Protocol ID	IRB Protocol Tracking ID	PBMC Type	Main Figures	Figure Supplements*
BRH1291132	BioIVT	SERATRIALS-18002	WIRB® Protocol #20190318	Ficoll		F1s2c; F1s2d; F1s3d; F1s3e; F1s5
HMN85396	BioIVT	SERATRIALS-18002	WIRB® Protocol #20190318	Leukapheresis	Figure 3, Figure 4	F1s2c; F1s2d; F1s3d; F1s3e; F3s2; F4s1; F4s2; F4s3; F4s4
RG1131	BioIVT	SERATRIALS-18002	WIRB® Protocol #20190318	Ficoll	Figure 1, Figure 2	F1s3a; F2s1; F2s2; F1s4
5716BW	BloodWorks NW	BT001	WIRB® Protocol #20141589	Ficoll		F1s2a; F1s3b
7811BW	BloodWorks NW	BT001	WIRB® Protocol #20141589	Ficoll		F1s2b; F1s3c
						*example: F1s2b = Figure 1 - figure supplement 2b
